# Supplementary material
Source: Royal Society of Chemistry journal article supplement (doi:10.1039/d5an01296a)
Supplement: d5an01296a1.pdf [file d5an01296a1.pdf]

## Supplementary Material

### **Se, S, N doped carbon dots based AuNPs for the recognition of 6-methyl nicotine in e-cigarettes by surface-enhanced Raman scattering**

Zhao Zhao<sup>#1</sup>, Qianqian Pang<sup>#2</sup>, Xi Wang<sup>2</sup>, Zhichao Chen<sup>2</sup>, Xianfang Rong<sup>2\*</sup>, Yaling. Yang<sup>1\*</sup>

<sup>1</sup> Faculty of Life Science and Technology, Kunming University of Science and Technology, Yunnan Province 650500, China.

<sup>2</sup> Research and Development Center, IMiracle (Shenzhen) Innovation Technology Co., Ltd, Shenzhen, China.

<sup>#</sup> These authors contributed equally.

\*Corresponding authors: E-mail: yangyl2016@qq.com (Yaling. Yang); E-mail: frank.rong@heavengifts.com (Xianfang Rong)

## **Experimental Section**

### **Assessment of and interference**

To validate the method's interference resistance, interfering substances present in e-cigarette oils samples were simultaneously identified. Interference resistance tests were conducted by introducing various potential interfering agents into the AuNPs/Se-CDs + 6-methyl nicotine (6-MN) system. These included nicotine, potassium chloride (KCl), sodium chloride (NaCl), calcium chloride (CaCl<sub>2</sub>), aluminum chloride (AlCl<sub>3</sub>), L-Cystine (L-Cys), alanine (Ala), D-Tyrosine (D-Tyr), leucine (Leu), maltose, glucose (Glu) at a concentration 20-fold higher than that of 6-MN.

### **Detection of 6-MN in e-cigarette oil samples using AuNPs/Se-CDs**

In a typical procedure, spiked samples were prepared by fortifying purified e-liquid with 6-MN at varying concentrations (0.40, 4.00, and 40.00 ng/mL). Each prepared spiked sample was individually introduced into a 0.3 mg/mL AuNPs/Se-CDs dispersion. The resulting reaction mixtures were incubated at room temperature for 10 minutes, and alterations in Raman intensity at the 811 cm<sup>-1</sup> band were monitored under excitation with a 785 nm laser. All experiments were performed in triplicate to ensure reproducibility.

## Figures and Tables

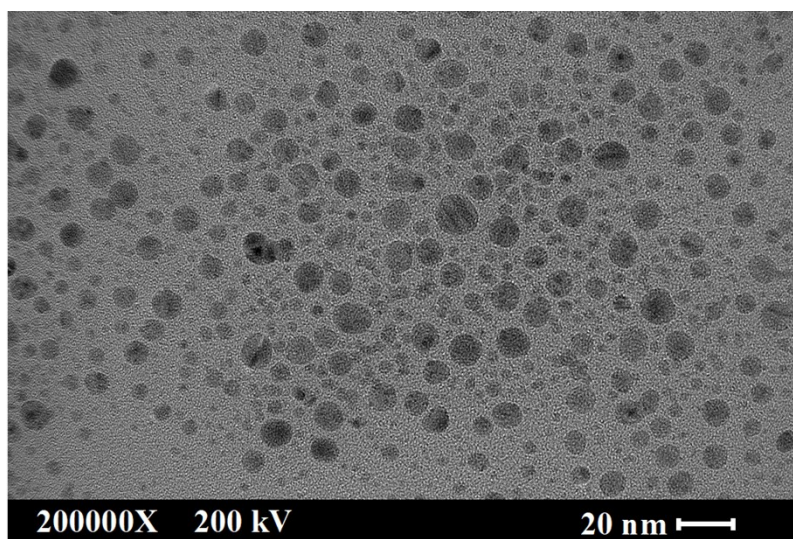

**Fig S1** TEM image of AuNPs/Se-CDs (**Fig. 1a** original image ).

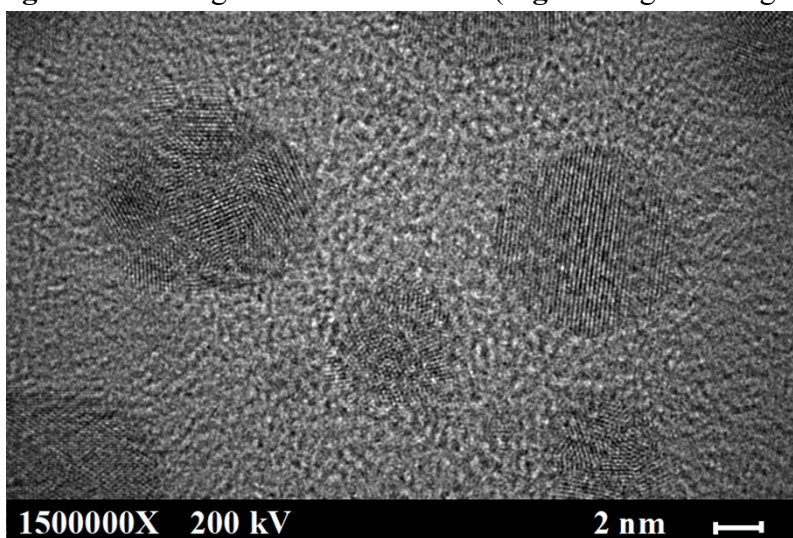

**Fig S2** HRTEM image of AuNPs/Se-CDs (Original image of the inset in **Fig. 1a**).

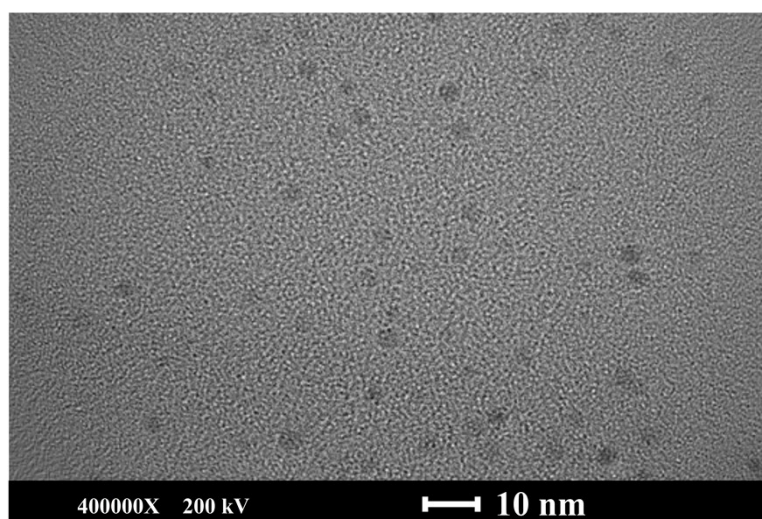

**Fig S3** TEM image of S,Se,N-CDs.

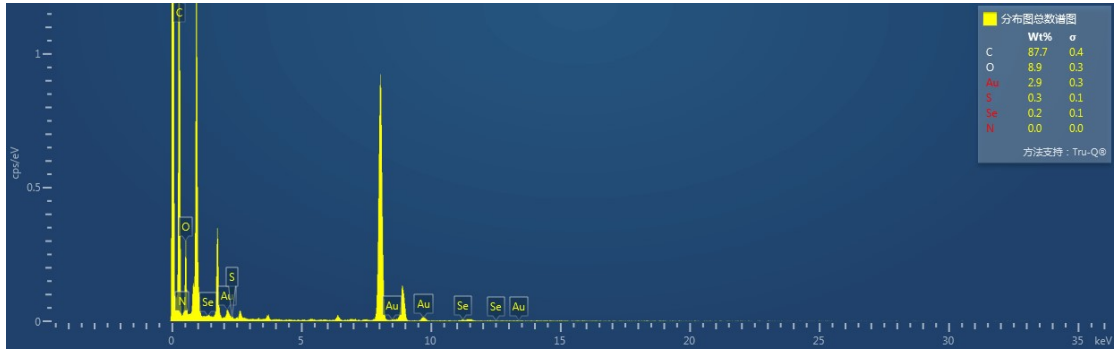

**Fig S4** EDS elemental mapping of the prepared AuNPs/Se-CDs.

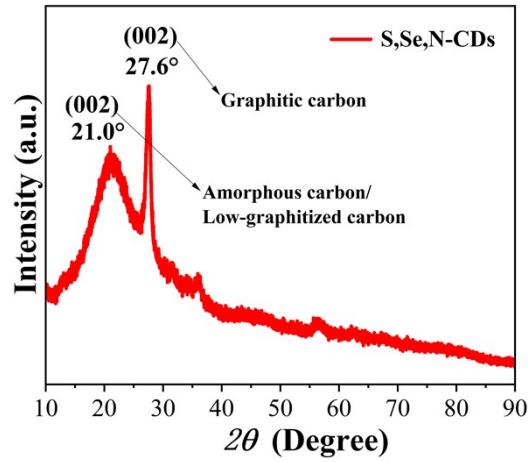

**Fig S5** XRD image of S,Se,N-CDs.

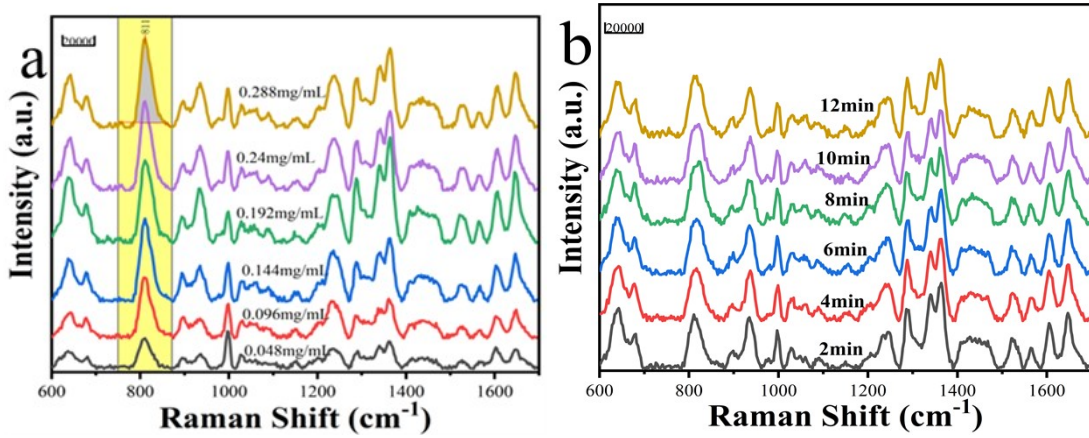

**Fig S6** The (a) reaction concentration of AuNPs/Se-CDs and (b) reaction time.

**Table S1** Each element contents in AuNPs/Se-CDs by XPS.

| Element  | Au    | C     | N    | O     | Se   | S    |
|----------|-------|-------|------|-------|------|------|
| Atomic % | 17.21 | 52.53 | 4.62 | 22.26 | 1.45 | 1.93 |

**Table S2** The calculation results of the actual sample detection (n=3).

| Samples            | Spiked<br>(ng/mL) | Measured value<br>(ng/mL) |       |       | Recovery (%) |       |       |         | RSD  |
|--------------------|-------------------|---------------------------|-------|-------|--------------|-------|-------|---------|------|
|                    |                   | n1                        | n2    | n3    | n1           | n2    | n3    | Average |      |
| Cigarette oil<br>A | 0                 |                           |       |       |              |       |       |         |      |
|                    | 0.4               | 0.37                      | 0.40  | 0.36  | 92.5         | 100.0 | 90.0  | 94.2    | 5.20 |
|                    | 4                 | 4.13                      | 3.93  | 4.19  | 103.3        | 98.3  | 104.8 | 102.1   | 3.40 |
|                    | 40                | 40.51                     | 39.97 | 38.94 | 101.3        | 99.9  | 97.4  | 99.5    | 1.99 |
| Cigarette oil<br>B | 0                 |                           |       |       |              |       |       |         |      |
|                    | 0.4               | 0.43                      | 0.39  | 0.41  | 107.5        | 102.5 | 97.5  | 102.5   | 5.00 |
|                    | 4                 | 4.02                      | 3.91  | 3.88  | 100.5        | 97.8  | 97.0  | 98.4    | 1.84 |
|                    | 40                | 41.16                     | 38.98 | 40.08 | 102.9        | 97.5  | 100.2 | 100.2   | 2.73 |
